# Supplementary material
Source: PubMed Central journal article supplement (PMC5576924)

**Supplemental Table 1**

| <b>Human Gene Name</b>    | <b>Drosophila Ortholog</b> | <b>Source</b> | <b>Source ID#</b>   |
|---------------------------|----------------------------|---------------|---------------------|
| PDSS1<br>(COQ1 subunit 1) | Qless                      | VDRC          | 106236              |
|                           |                            | BDSC          | 60026               |
| PDSS2<br>(COQ1 subunit 2) | Pdss2<br>(CG10585)         | BDSC          | 43301, 51910        |
| COQ2                      | Coq2<br>(CG9613)           | BDSC          | 27054, 53276        |
| COQ3                      | Coq3<br>(CG9249)           | VDRC          | 47643               |
|                           |                            | BDSC          | 54042               |
| COQ4                      | Coq4<br>(CG32174)          | VDRC          | 100816              |
|                           |                            | BDSC          | 42007               |
| COQ5                      | Coq5<br>(CG2453)           | VDRC          | 100031, 20872       |
| COQ6                      | Coq6<br>(CG7277)           | VDRC          | 30691, 30693        |
| COQ7                      | Coq7<br>(CG14437)          | VDRC          | 106100              |
|                           |                            | BDSC          | 50522               |
| COQ8 (ADCK4)              | Coq8<br>(CG32649)          | BDSC          | 35348, 43229, 57039 |
| COQ9                      | Coq9<br>(CG30493)          | VDRC          | 105722              |
|                           |                            | BDSC          | 53336               |
| ULK1                      | Atg1                       | BDSC          | 26731               |
| BECN1                     | Atg6                       | BDSC          | 28060               |

# Supplementary Figure 1

A

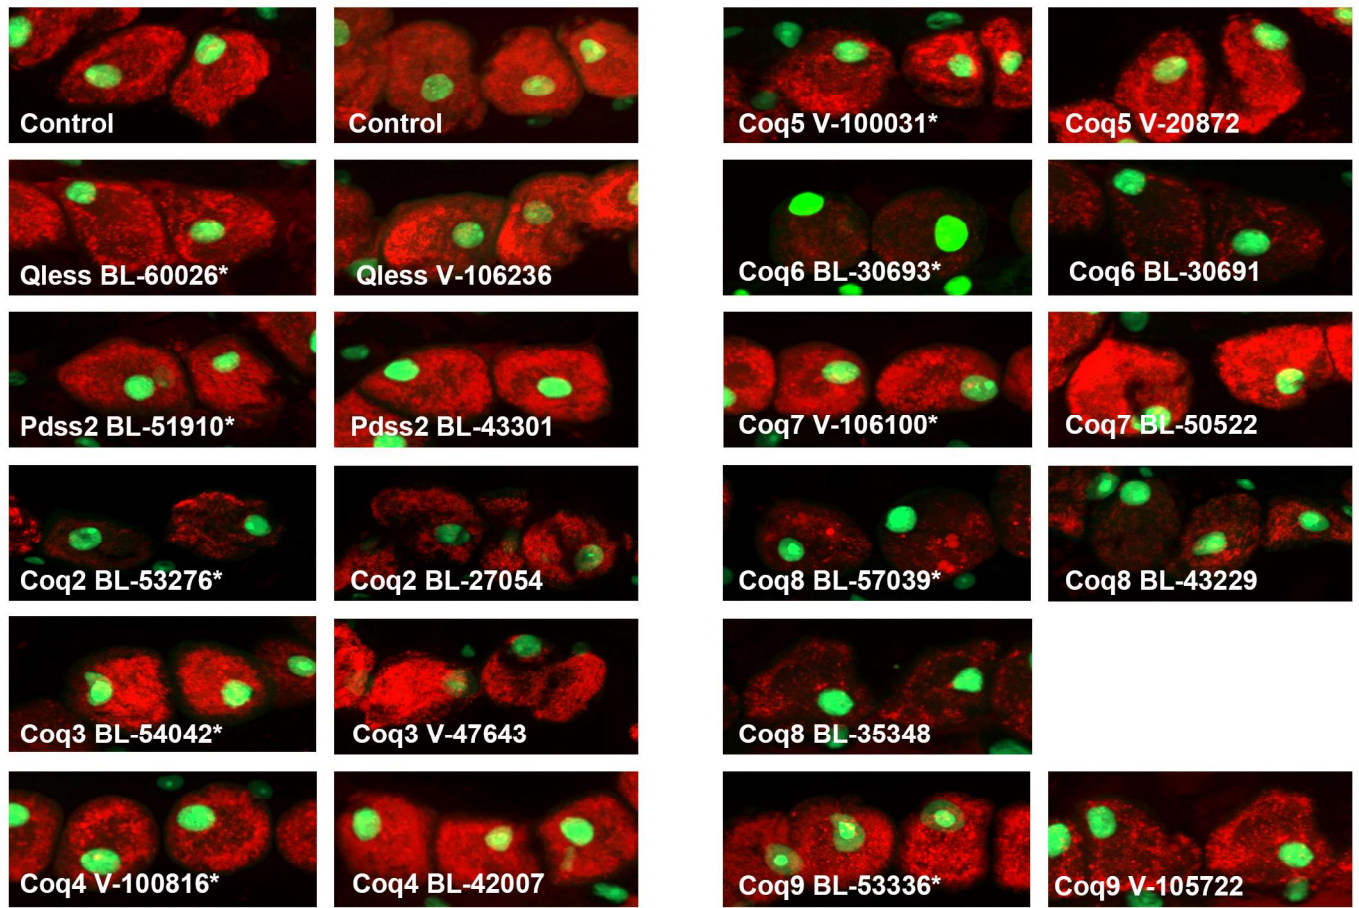

B

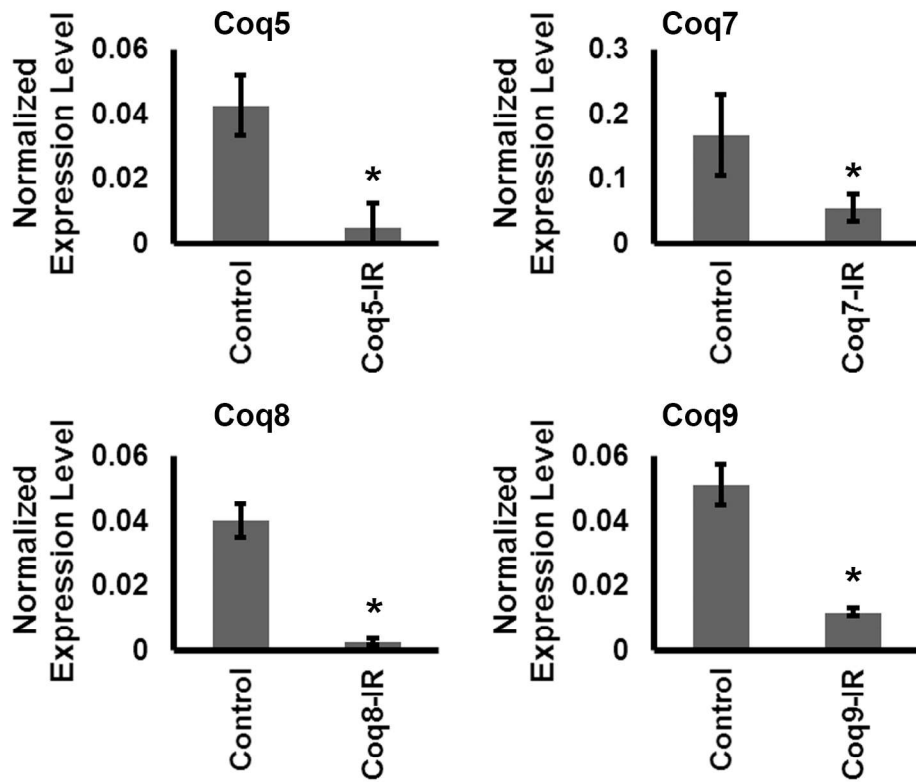

Supplement: ASN.2016060626SupplementaryData.pdf [file ASN.2016060626SupplementaryData.pdf]
